# Supplementary material for: Thermodynamic Solution Properties of a Biodegradable Chelant (L-glutamic-N,N-diacetic Acid, L-GLDA) and Its Sequestering Ability toward Cd2+
Source: MDPI journal article supplement (doi:10.3390/molecules26237087), 2021-11-23
Supplement: s1 [file s1]

Supplementary File

# Thermodynamic Solution Properties of a Biodegradable Chelant (L-glutamic-N,N-diacetic Acid, L-GLDA) and Its Sequestering Ability toward $\text{Cd}^{2+}$

Clemente Bretti<sup>1</sup>, Roberto Di Pietro<sup>1</sup>, Paola Cardiano<sup>1</sup>, Olivia Gomez-Laserna<sup>2</sup>, Anna Irto<sup>1</sup>, Gabriele Lando<sup>1,\*</sup> and Concetta De Stefano<sup>1</sup>

<sup>1</sup> Department of Chemical, Biological, Pharmaceutical and Environmental Sciences, University of Messina, Viale Ferdinando Stagno d'Alcontres 31, I-98166 Messina (Vill. S. Agata), Italy; cbretti@unime.it (C.B.); robdipietro@unime.it (R.D.P.); pcardiano@unime.it (P.C.); airto@unime.it (A.I.); cdestefano@unime.it (C.D.S.)

<sup>2</sup> Department of Analytical Chemistry, University of the Basque Country (EHU/UPV), Barrio Sarriena s/n, E-48080 Leioa, Bilbao, Spain; olivia.gomez@ehu.eus

\* Correspondence: glando@unime.it

**Table S1.** Experimental values of the protonation constants ( $\pm 95\%$  confidence interval) of L-glutamic N,N-diacetic acid (L-GLDA) in different ionic media, at different temperatures and at different ionic strengths.

| Medium                                           | $T^a$  | $I_c^b$ | $I_m^c$ | $\log K_1^{H_c}$ | $\log K_1^{H_m}$ | $\log K_2^{H_c}$ | $\log K_2^{H_m}$ | $\log K_3^{H_c}$ | $\log K_3^{H_m}$ | $\log K_4^{H_c}$ | $\log K_4^{H_m}$ |
|--------------------------------------------------|--------|---------|---------|------------------|------------------|------------------|------------------|------------------|------------------|------------------|------------------|
| NaCl                                             | 288.15 | 0.116   | 0.116   | $9.58 \pm 0.01$  | 9.576            | $4.62 \pm 0.01$  | 4.617            | $2.55 \pm 0.01$  | 2.544            | $1.70 \pm 0.04$  | 1.70             |
|                                                  | 288.15 | 0.268   | 0.269   | $9.35 \pm 0.02$  | 9.348            | $4.55 \pm 0.02$  | 4.548            | $2.51 \pm 0.04$  | 2.508            | $1.61 \pm 0.04$  | 1.61             |
|                                                  | 288.15 | 0.498   | 0.503   | $9.03 \pm 0.01$  | 9.03             | $4.51 \pm 0.01$  | 4.506            | $2.60 \pm 0.02$  | 2.592            | $1.13 \pm 0.06$  | 1.13             |
|                                                  | 288.15 | 0.981   | 0.999   | $8.87 \pm 0.01$  | 8.857            | $4.41 \pm 0.01$  | 4.40             | $2.36 \pm 0.02$  | 2.349            | $1.37 \pm 0.02$  | 1.36             |
|                                                  | 310.15 | 0.140   | 0.141   | $9.34 \pm 0.04$  | 9.34             | $4.56 \pm 0.03$  | 4.552            | $2.53 \pm 0.03$  | 2.526            | $1.27 \pm 0.14$  | 1.27             |
|                                                  | 310.15 | 0.262   | 0.265   | $9.19 \pm 0.03$  | 9.182            | $4.41 \pm 0.03$  | 4.401            | $2.20 \pm 0.03$  | 2.192            | $1.71 \pm 0.10$  | 1.70             |
|                                                  | 310.15 | 0.503   | 0.511   | $8.94 \pm 0.03$  | 8.934            | $4.34 \pm 0.03$  | 4.329            | $2.19 \pm 0.03$  | 2.186            | $1.23 \pm 0.20$  | 1.22             |
|                                                  | 310.15 | 0.962   | 0.987   | $8.68 \pm 0.03$  | 8.672            | $4.27 \pm 0.03$  | 4.254            | $2.01 \pm 0.04$  | 2.001            | $1.10 \pm 0.22$  | 1.09             |
| KCl                                              | 288.15 | 0.126   | 0.127   | $9.65 \pm 0.04$  | 9.648            | $4.58 \pm 0.04$  | 4.578            | $2.52 \pm 0.04$  | 2.518            | $1.38 \pm 0.20$  | 1.38             |
|                                                  | 288.15 | 0.247   | 0.249   | $9.51 \pm 0.02$  | 9.507            | $4.59 \pm 0.02$  | 4.587            | $2.26 \pm 0.08$  | 2.257            | $1.40 \pm 0.39$  | 1.40             |
|                                                  | 288.15 | 0.478   | 0.485   | $9.51 \pm 0.01$  | 9.504            | $4.46 \pm 0.12$  | 4.454            | $2.37 \pm 0.02$  | 2.364            | $1.45 \pm 0.04$  | 1.44             |
|                                                  | 288.15 | 0.990   | 1.019   | $9.53 \pm 0.06$  | 9.518            | $4.46 \pm 0.08$  | 4.448            | $2.38 \pm 0.08$  | 2.368            | $1.96 \pm 0.08$  | 1.95             |
|                                                  | 298.15 | 0.118   | 0.119   | $9.55 \pm 0.01$  | 9.543            | $4.61 \pm 0.01$  | 4.606            | $2.65 \pm 0.01$  | 2.643            | $1.70 \pm 0.20$  | 1.69             |
|                                                  | 298.15 | 0.266   | 0.269   | $9.42 \pm 0.01$  | 9.413            | $4.48 \pm 0.01$  | 4.479            | $2.50 \pm 0.02$  | 2.499            | $1.81 \pm 0.08$  | 1.81             |
|                                                  | 298.15 | 0.452   | 0.459   | $9.51 \pm 0.01$  | 9.502            | $4.52 \pm 0.01$  | 4.511            | $2.40 \pm 0.02$  | 2.396            | $2.53 \pm 0.02$  | 2.52             |
|                                                  | 298.15 | 0.488   | 0.496   | $9.46 \pm 0.02$  | 9.456            | $4.61 \pm 0.02$  | 4.598            | $2.69 \pm 0.04$  | 2.685            | $2.40 \pm 0.04$  | 2.39             |
|                                                  | 298.15 | 0.947   | 0.976   | $9.36 \pm 0.01$  | 9.344            | $4.44 \pm 0.01$  | 4.424            | $2.54 \pm 0.02$  | 2.531            | $1.32 \pm 0.29$  | 1.31             |
|                                                  | 310.15 | 0.110   | 0.111   | $9.33 \pm 0.03$  | 9.326            | $4.60 \pm 0.03$  | 4.596            | $2.73 \pm 0.03$  | 2.726            | $1.82 \pm 0.04$  | 1.82             |
|                                                  | 310.15 | 0.110   | 0.111   | $9.45 \pm 0.03$  | 9.445            | $4.62 \pm 0.03$  | 4.619            | $2.68 \pm 0.03$  | 2.674            | $1.72 \pm 0.04$  | 1.72             |
|                                                  | 310.15 | 0.120   | 0.121   | $9.44 \pm 0.03$  | 9.439            | $4.56 \pm 0.03$  | 4.557            | $2.53 \pm 0.03$  | 2.521            | $1.76 \pm 0.04$  | 1.76             |
|                                                  | 310.15 | 0.250   | 0.253   | $9.44 \pm 0.03$  | 9.429            | $4.53 \pm 0.03$  | 4.526            | $2.59 \pm 0.03$  | 2.58             | $1.83 \pm 0.04$  | 1.82             |
|                                                  | 310.15 | 0.490   | 0.500   | $9.26 \pm 0.03$  | 9.254            | $4.37 \pm 0.03$  | 4.361            | $2.31 \pm 0.04$  | 2.297            | $0.36 \pm 0.39$  | 0.35             |
|                                                  | 310.15 | 0.980   | 1.015   | $9.24 \pm 0.03$  | 9.226            | $4.39 \pm 0.03$  | 4.377            | $2.41 \pm 0.04$  | 2.397            | $1.06 \pm 0.08$  | 1.04             |
| (C <sub>2</sub> H <sub>5</sub> ) <sub>4</sub> NI | 288.15 | 0.144   | 0.148   | $9.80 \pm 0.01$  | 9.789            | $4.72 \pm 0.01$  | 4.705            | $2.65 \pm 0.01$  | 2.64             | $1.70 \pm 0.02$  | 1.69             |
|                                                  | 288.15 | 0.281   | 0.297   | $9.86 \pm 0.01$  | 9.84             | $4.71 \pm 0.01$  | 4.684            | $2.68 \pm 0.02$  | 2.657            | $1.74 \pm 0.02$  | 1.72             |
|                                                  | 288.15 | 0.525   | 0.581   | $9.83 \pm 0.01$  | 9.782            | $4.71 \pm 0.01$  | 4.664            | $2.67 \pm 0.01$  | 2.624            | $1.87 \pm 0.02$  | 1.82             |
|                                                  | 288.15 | 0.748   | 0.867   | $9.87 \pm 0.01$  | 9.807            | $4.76 \pm 0.01$  | 4.695            | $2.73 \pm 0.02$  | 2.669            | $1.87 \pm 0.02$  | 1.81             |
|                                                  | 310.15 | 0.118   | 0.121   | $9.66 \pm 0.03$  | 9.644            | $4.72 \pm 0.03$  | 4.708            | $2.73 \pm 0.03$  | 2.714            | $1.67 \pm 0.04$  | 1.66             |
|                                                  | 310.15 | 0.290   | 0.309   | $9.62 \pm 0.03$  | 9.592            | $4.70 \pm 0.03$  | 4.669            | $2.73 \pm 0.03$  | 2.698            | $1.68 \pm 0.04$  | 1.65             |
|                                                  | 310.15 | 0.657   | 0.754   | $9.60 \pm 0.03$  | 9.538            | $4.68 \pm 0.03$  | 4.623            | $2.69 \pm 0.03$  | 2.63             | $1.66 \pm 0.10$  | 1.60             |
|                                                  | 310.15 | 0.726   | 0.845   | $9.62 \pm 0.03$  | 9.556            | $4.74 \pm 0.03$  | 4.677            | $2.72 \pm 0.03$  | 2.649            | $1.62 \pm 0.04$  | 1.55             |
|                                                  | 310.15 | 0.739   | 0.862   | $9.61 \pm 0.03$  | 9.547            | $4.71 \pm 0.03$  | 4.647            | $2.69 \pm 0.03$  | 2.625            | $1.33 \pm 0.04$  | 1.26             |

A in K;

**Table S2.** Overall metal ligand complex formation constants, ionic strength dependence parameters and fit statistics of Cd<sup>2+</sup>/Glda<sup>4-</sup> system for some proposed speciation models obtained in the pH range 2.0 < pH < 5.0.

| Trial | Species                                                      | $\log \beta_{ij}^0$ | C <sub>ji</sub>  | Max (%) | pH  | $\sigma_{fit}$ | MD <sub>fit</sub> |
|-------|--------------------------------------------------------------|---------------------|------------------|---------|-----|----------------|-------------------|
| 1     | ML                                                           | $11.09 \pm 0.02$    | $0.13 \pm 0.04$  | 27.0    | 5.0 | 3.9            | 1.4               |
|       | M <sub>2</sub> H <sub>3</sub> L                              | $27.04 \pm 0.03$    | $3.14 \pm 0.07$  | 39.0    | 2.3 |                |                   |
|       | M <sub>3</sub> H <sub>3</sub> L <sub>2</sub>                 | $45.15 \pm 0.02$    | $3.33 \pm 0.10$  | 2.7     | 4.3 |                |                   |
| 2     | ML                                                           | $11.19 \pm 0.02$    | $0.60 \pm 0.03$  | 35.0    | 5.0 | 3.7            | 1.19              |
|       | MHL                                                          | $16.79 \pm 0.07$    | $0.26 \pm 0.04$  | 20.5    | 5.0 |                |                   |
|       | M <sub>2</sub> H <sub>2</sub> L                              | $24.10 \pm 0.07$    | $-0.67 \pm 0.44$ | 0.1     | 2.3 |                |                   |
| 3     | ML                                                           | $10.62 \pm 0.01$    | $1.37 \pm 0.02$  | 31.2    | 5.0 | 3.8            | 1.35              |
|       | M <sub>2</sub> H <sub>2</sub> L <sub>2</sub>                 | $35.14 \pm 0.01$    | $2.67 \pm 0.03$  | 5.5     | 5.0 |                |                   |
| 4     | ML                                                           | $10.62 \pm 0.01$    | $1.26 \pm 0.02$  | 30.0    | 5.0 | 3.9            | 1.40              |
|       | M <sub>2</sub> H <sub>2</sub> L <sub>2</sub> Cl <sub>2</sub> | $35.99 \pm 0.02$    | $-0.89 \pm 0.05$ | 8.0     | 4.5 |                |                   |
| 5     | ML                                                           | $10.99 \pm 0.02$    | $0.02 \pm 0.04$  | 25.0    | 5.0 | 3.7            | 1.26              |
|       | M <sub>2</sub> HL                                            | $21.06 \pm 0.02$    | $1.10 \pm 0.06$  | 6.5     | 5.0 |                |                   |
|       | M <sub>2</sub> H <sub>3</sub> L                              | $26.04 \pm 0.02$    | $4.18 \pm 0.06$  | 22.4    | 2.3 |                |                   |
| 6     | ML                                                           | $10.57 \pm 0.01$    | $1.42 \pm 0.02$  | 32.0    | 5.0 | 4.0            | 1.50              |
|       | M <sub>3</sub> H <sub>3</sub> L <sub>3</sub>                 | $53.91 \pm 0.02$    | $3.90 \pm 0.05$  | 1.5     | 5.0 |                |                   |
| 7     | ML                                                           | $10.96 \pm 0.01$    | $0.89 \pm 0.03$  | 34.0    | 5.0 | 3.6            | 1.17              |

|           |                                                |              |              |      |     |      |      |
|-----------|------------------------------------------------|--------------|--------------|------|-----|------|------|
|           | <b>M<sub>2</sub>H<sub>2</sub>L<sub>2</sub></b> | 35.52 ± 0.02 | 2.06 ± 0.04  | 5.9  | 5.5 |      |      |
|           | <b>M<sub>2</sub>H<sub>3</sub>L<sub>2</sub></b> | 40.04 ± 0.03 | −0.52 ± 0.21 | 0.1  | 4.0 |      |      |
| <b>8</b>  | <b>ML</b>                                      | 10.27 ± 0.02 | 1.61 ± 0.02  | 22.0 | 5.0 | 4.35 | 1.65 |
|           | <b>MH<sub>2</sub>L<sub>2</sub></b>             | 29.22 ± 0.01 | 0.22 ± 0.04  | 12.2 | 5.0 |      |      |
| <b>9</b>  | <b>ML</b>                                      | 10.36 ± 0.01 | 1.57 ± 0.02  | 27.0 | 5.0 | 4.4  | 1.66 |
|           | <b>M<sub>2</sub>H<sub>3</sub>L<sub>3</sub></b> | 47.50 ± 0.02 | 1.08 ± 0.04  | 37.4 | 4.5 |      |      |
| <b>10</b> | <b>ML</b>                                      | 10.84 ± 0.01 | 1.06 ± 0.02  | 34.0 | 5.0 | 3.7  | 1.25 |
|           | <b>M<sub>3</sub>H<sub>4</sub>L<sub>3</sub></b> | 59.14 ± 0.04 | 2.00 ± 0.21  | 0.1  | 4.7 |      |      |
|           | <b>M<sub>3</sub>H<sub>3</sub>L<sub>3</sub></b> | 54.17 ± 0.03 | 3.54 ± 0.06  | 5.0  | 4.7 |      |      |
| <b>11</b> | <b>ML</b>                                      | 10.11±0.03   | 1.28 ± 0.06  | 18.0 | 5.0 | 5.0  | 1.90 |
|           | <b>MH<sub>3</sub>L</b>                         | 23.20±0.04   | 2.01 ± 0.06  | 24.6 | 2.3 |      |      |
| <b>12</b> | <b>M<sub>3</sub>H<sub>4</sub>L<sub>3</sub></b> | 59.03 ± 0.03 | 1.15 ± 0.06  | 20.4 | 5.7 | 5.8  | 2.30 |
| <b>13</b> | <b>M<sub>3</sub>H<sub>2</sub>L<sub>2</sub></b> | 39.80 ± 0.03 | 4.16 ± 0.06  | 24.8 | 5.3 | 4.8  | 1.60 |
|           | <b>M<sub>3</sub>H<sub>3</sub>L<sub>4</sub></b> | 59.64 ± 0.06 | 0.53 ± 0.06  | 1.5  | 5.0 |      |      |
| <b>14</b> | <b>M<sub>4</sub>H<sub>2</sub>L<sub>4</sub></b> | 59.85 ± 0.03 | 3.95 ± 0.06  | 17.9 | 5.3 | 6.0  | 2.50 |
| <b>15</b> | <b>M<sub>3</sub>H<sub>2</sub>L<sub>4</sub></b> | 51.63 ± 0.04 | 0.69 ± 0.08  | 21.7 | 5.2 | 4.8  | 1.70 |
|           | <b>M<sub>5</sub>H<sub>3</sub>L<sub>4</sub></b> | 73.10 ± 0.02 | 7.57 ± 0.06  | 1.7  | 5.2 |      |      |
| <b>16</b> | <b>ML</b>                                      | 10.89 ± 0.01 | 1.01 ± 0.02  | 30.9 | 5.0 | 3.7  | 1.10 |
|           | <b>MHL</b>                                     | 16.44 ± 0.01 | 0.84 ± 0.04  | 19.0 | 4.7 |      |      |
| <b>17</b> | <b>ML</b>                                      | 11.46 ± 0.03 | 0.25 ± 0.04  | 35.2 | 5.0 | 3.6  | 1.10 |
|           | <b>MHL</b>                                     | 16.94 ± 0.02 | 0.15 ± 0.03  | 22.9 | 4.6 |      |      |
|           | <b>MH<sub>2</sub>L</b>                         | 20.40 ± 0.03 | −0.35 ± 0.03 | 1.5  | 3.6 |      |      |
| <b>18</b> | <b>ML</b>                                      | 11.10 ± 0.02 | 0.85 ± 0.04  | 39.1 | 5.0 | 4.2  | 1.70 |
|           | <b>M<sub>2</sub>HL</b>                         | 20.61 ± 0.03 | 2.56 ± 0.08  | 8.3  | 4.5 |      |      |
| <b>19</b> | <b>M<sub>3</sub>H<sub>2</sub>L<sub>4</sub></b> | 52.02 ± 0.04 | −0.58 ± 0.07 | 20.2 | 5.0 | 6.4  | 2.70 |
